# Supplementary material for: An explicitly correlated six-dimensional potential energy surface for the SiCSi + H2 complex
Source: Royal Society of Chemistry journal article supplement (doi:10.1039/d2cp03872b), 2023-01-01
Supplement: d2cp03872b8.pdf [file d2cp03872b8.pdf]

# Explicitly correlated six-dimensional potential energy surface for the SiCSi+H<sub>2</sub> complex (Supplementary materials)

Lisán David Cabrera-González,<sup>†</sup> Dayán Páez-Hernández,<sup>†</sup> Thierry Stoecklin,<sup>‡</sup>  
and Otoniel Denis-Alpizar<sup>\*,¶</sup>

<sup>†</sup>*Doctorado en Fisicoquímica Molecular, Facultad de Ciencias Exactas, Universidad Andres  
Bello, República 275, Santiago, Chile*

<sup>‡</sup>*Institut des Sciences Moléculaires, Université de Bordeaux, CNRS UMR 5255, 33405  
Talence Cedex, France*

<sup>¶</sup>*Grupo de Investigación en Física Aplicada, Instituto de Ciencias Químicas Aplicadas,  
Facultad de Ingeniería, Universidad Autónoma de Chile, Av. Pedro de Valdivia 425,  
Providencia, Santiago, Chile*

E-mail: otonieldenisalpizar@gmail.com

### 3.1.2 Features of the surface

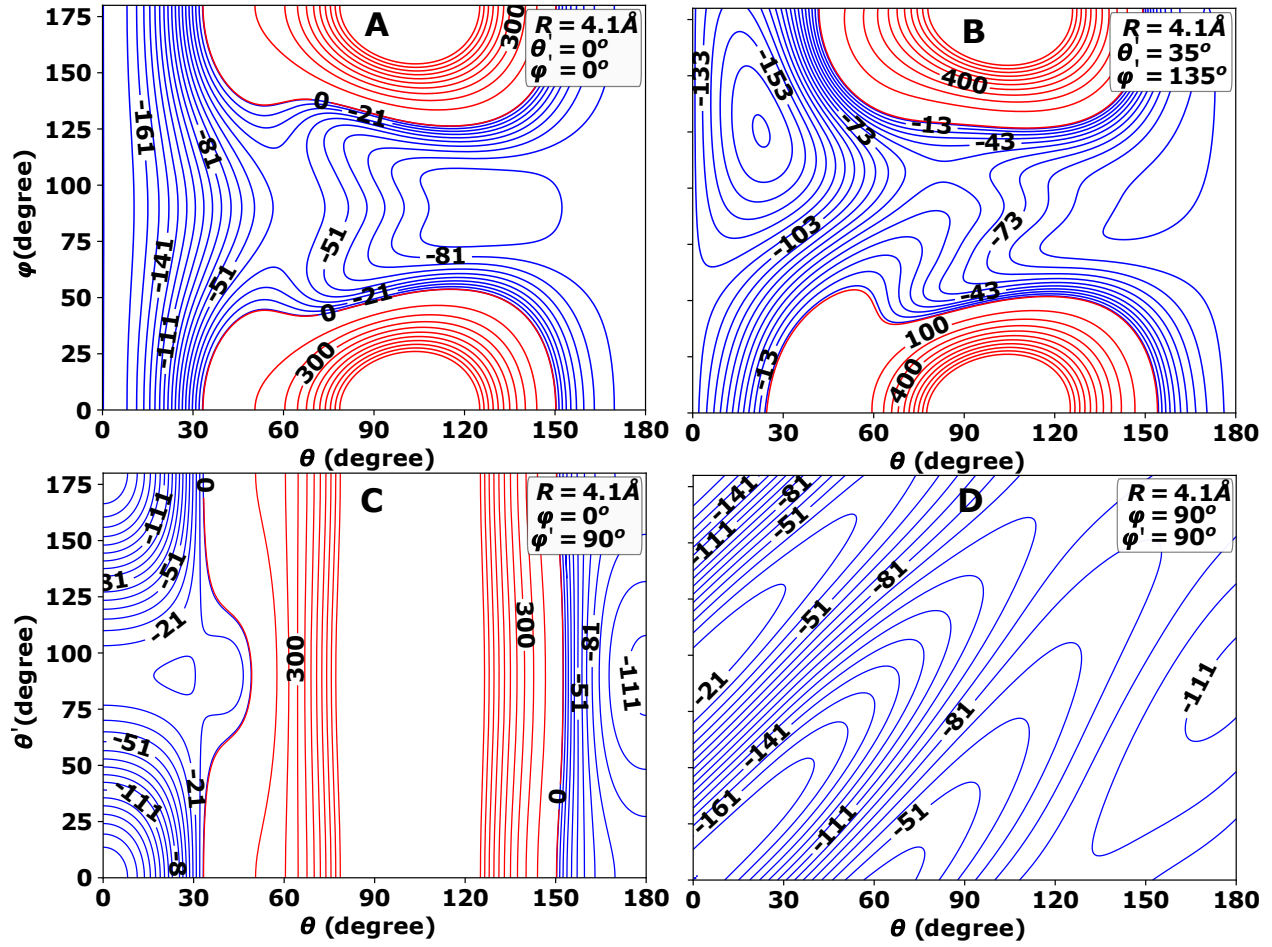

Figure 1: Contour plots of the PES at different angular configurations for  $\gamma = \gamma_e$ . Negative (blue lines) and positive (red lines) energies are separated in steps of  $10 \text{ cm}^{-1}$  and  $100 \text{ cm}^{-1}$ , respectively.

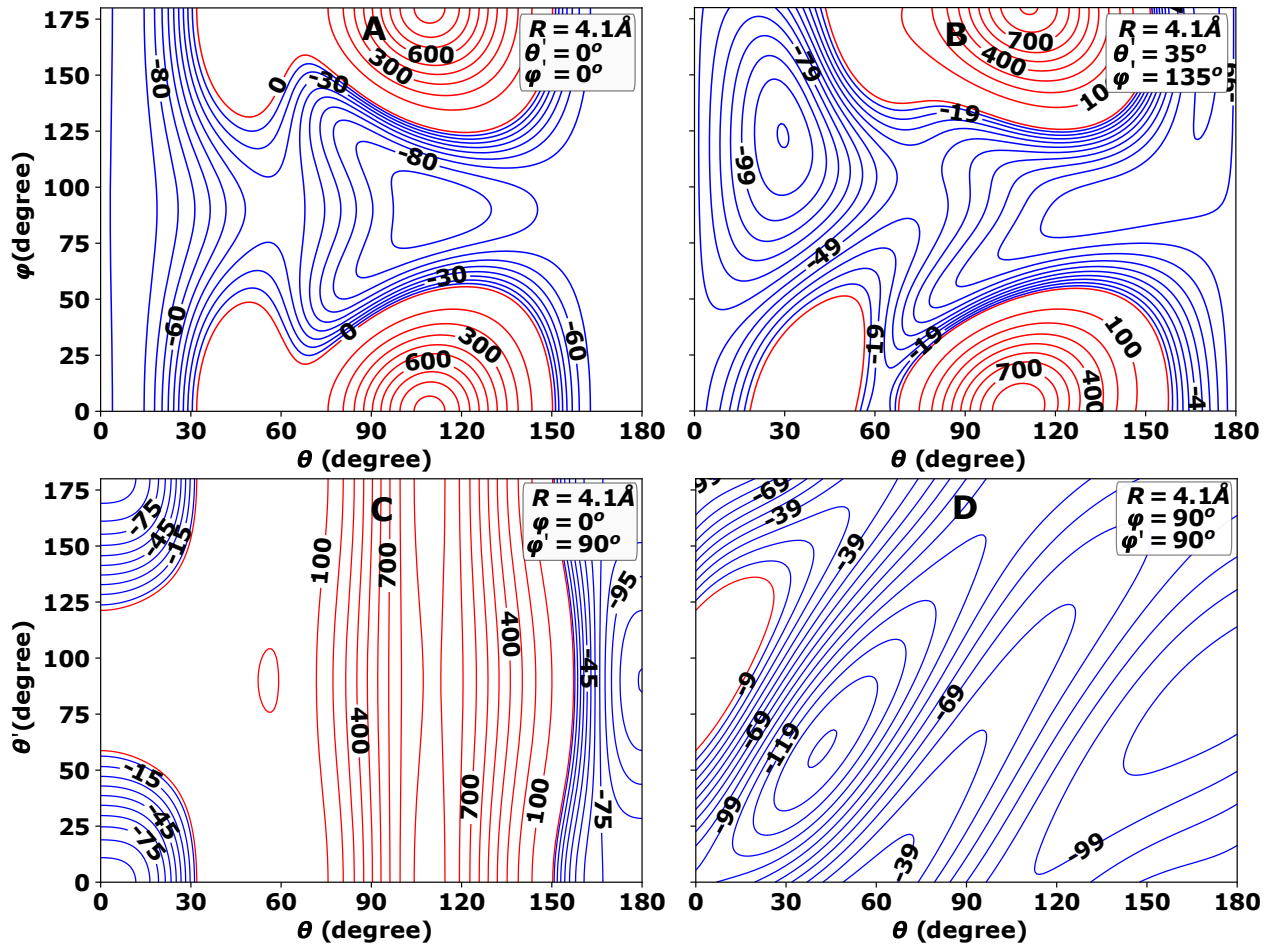

Figure 2: Same as Fig. 1 but for  $\gamma = 80^\circ$ .

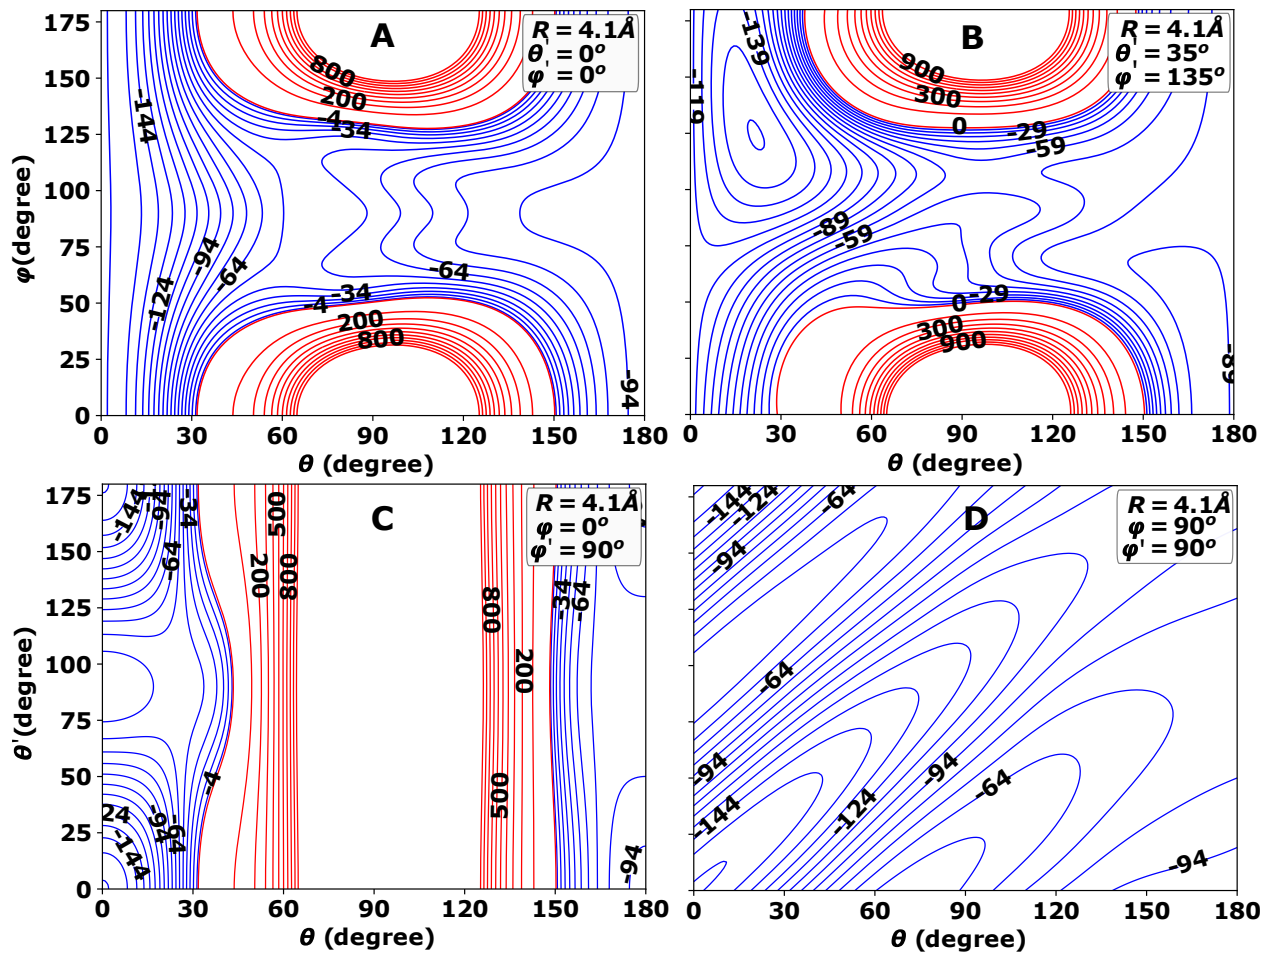

Figure 3: Same as Fig. 1 but for  $\gamma = 150^\circ$ .

### 3.1.3 Long range behavior

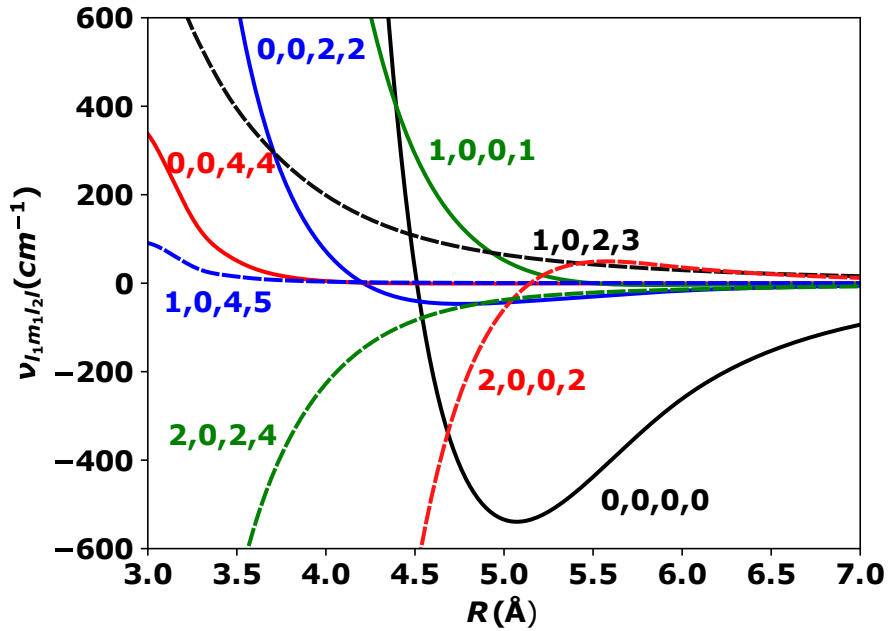

Figure 4: First  $v_{l_1 m_1 l_2 l}(\gamma_e, R)$  radial coefficients of the SiCSi-H<sub>2</sub> PES.

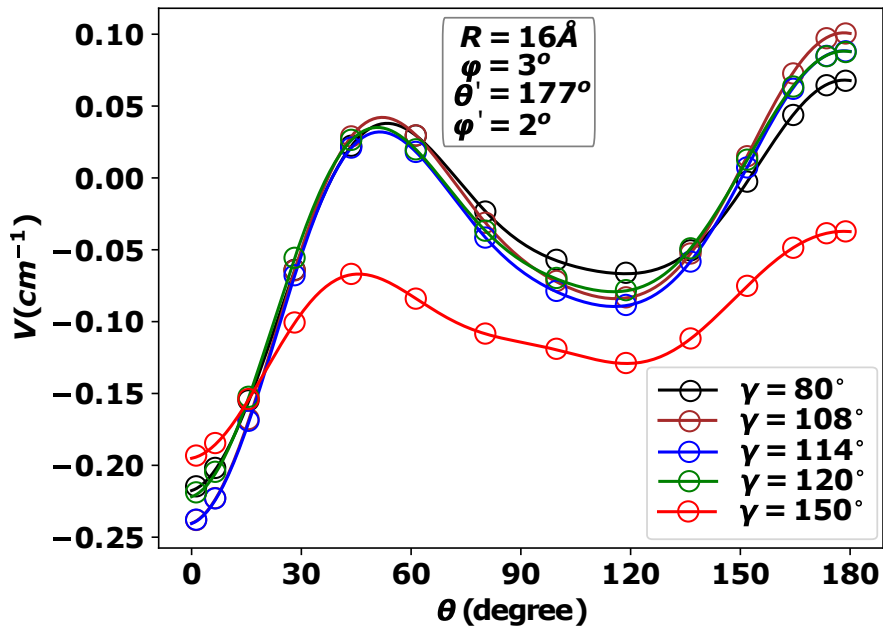

Figure 5: Analytical (lines) and *ab initio* (points) energies of the SiCSi-H<sub>2</sub> complex at  $R = 16$  Å for several values of  $\gamma$ , at a fixed configuration of  $\varphi$ ,  $\theta'$  and  $\varphi'$ . These *ab initio* energies were not included in the fitting procedure.

## 3.2 Averaged four-dimensional PES

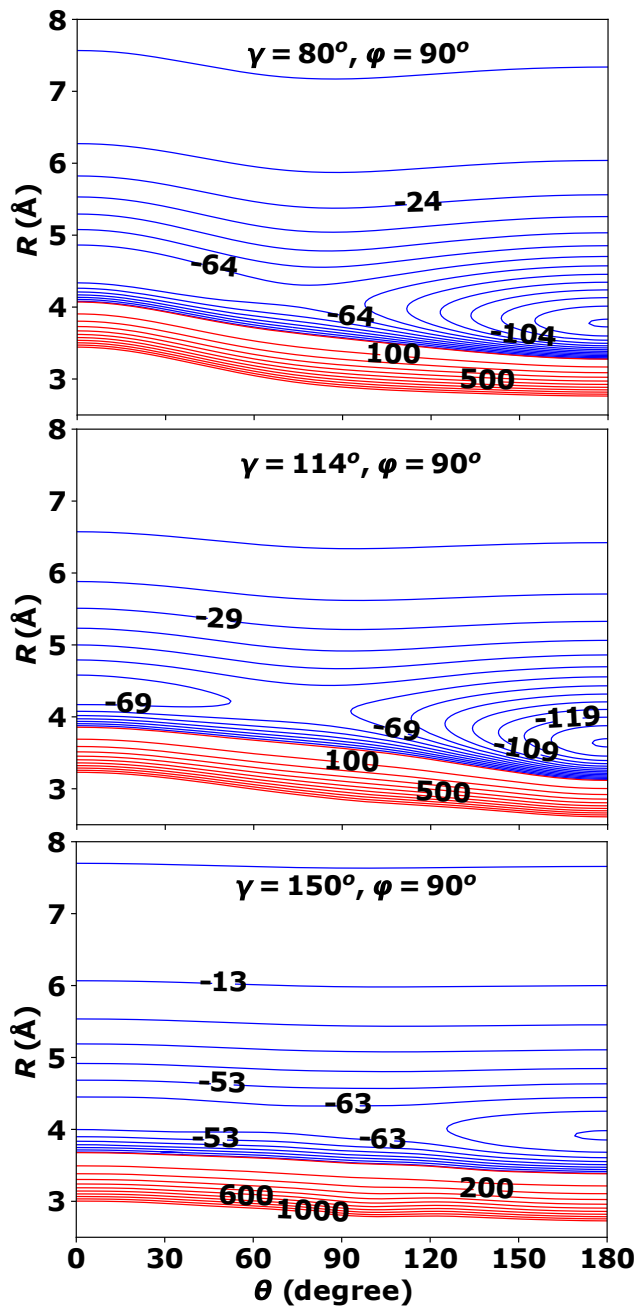

Figure 6: Contour plots of the PES of SiCSi-H<sub>2</sub> averaged over the H<sub>2</sub> orientation for  $\varphi = 90^\circ$  at several values of  $\gamma$ . Negative (blue lines) and positive (red lines) energies are separated in steps of  $6 \text{ cm}^{-1}$  and  $50 \text{ cm}^{-1}$ , respectively.
