# Supplementary figures and images for: An explicitly correlated six-dimensional potential energy surface for the SiCSi + H2 complex
Source: Royal Society of Chemistry journal article supplement (doi:10.1039/d2cp03872b), 2023-01-01

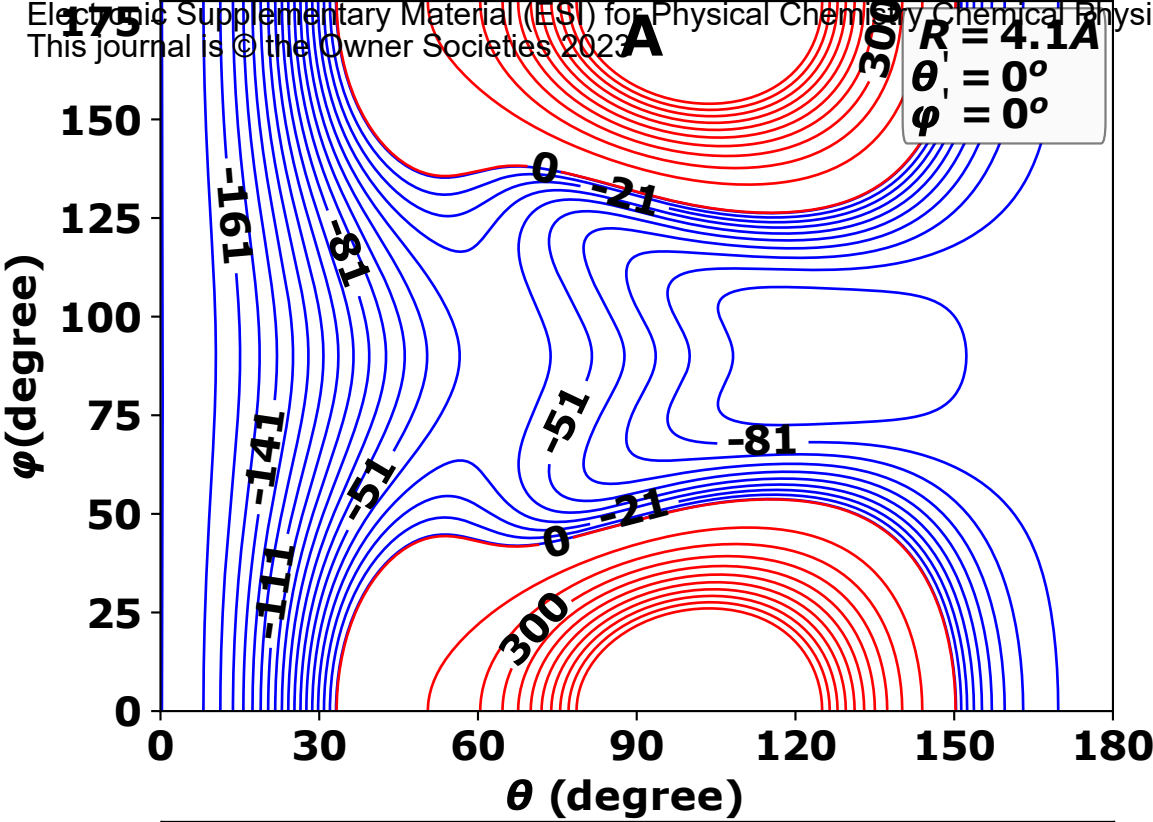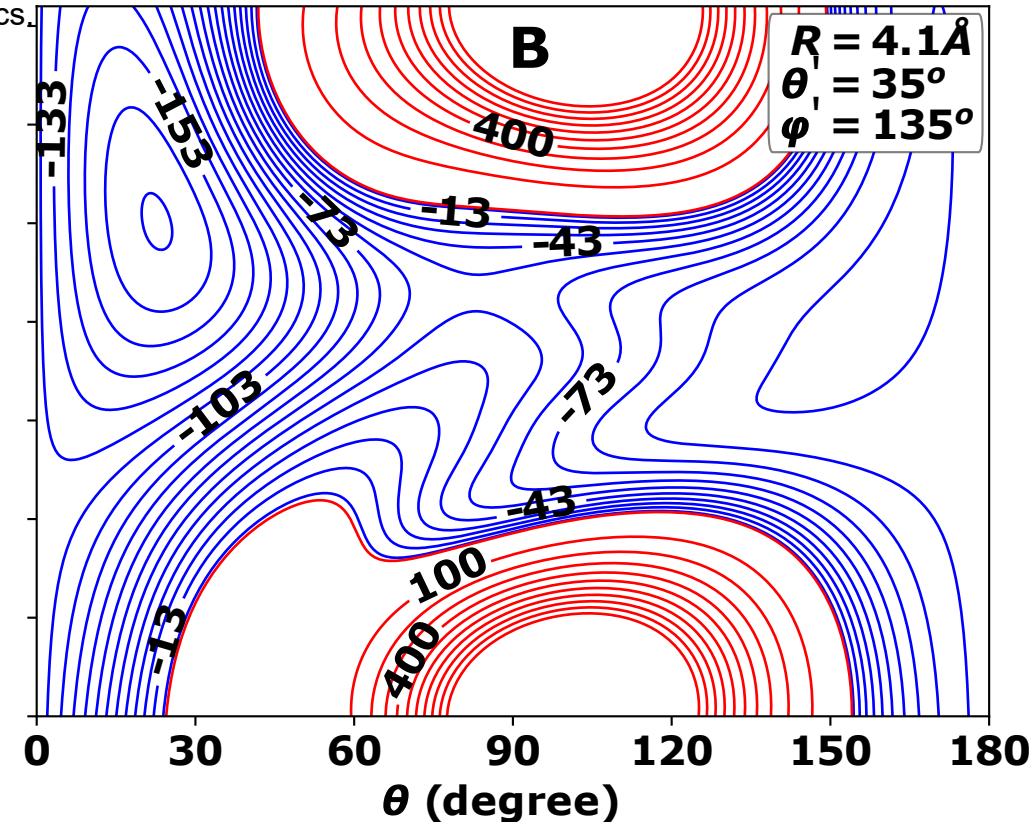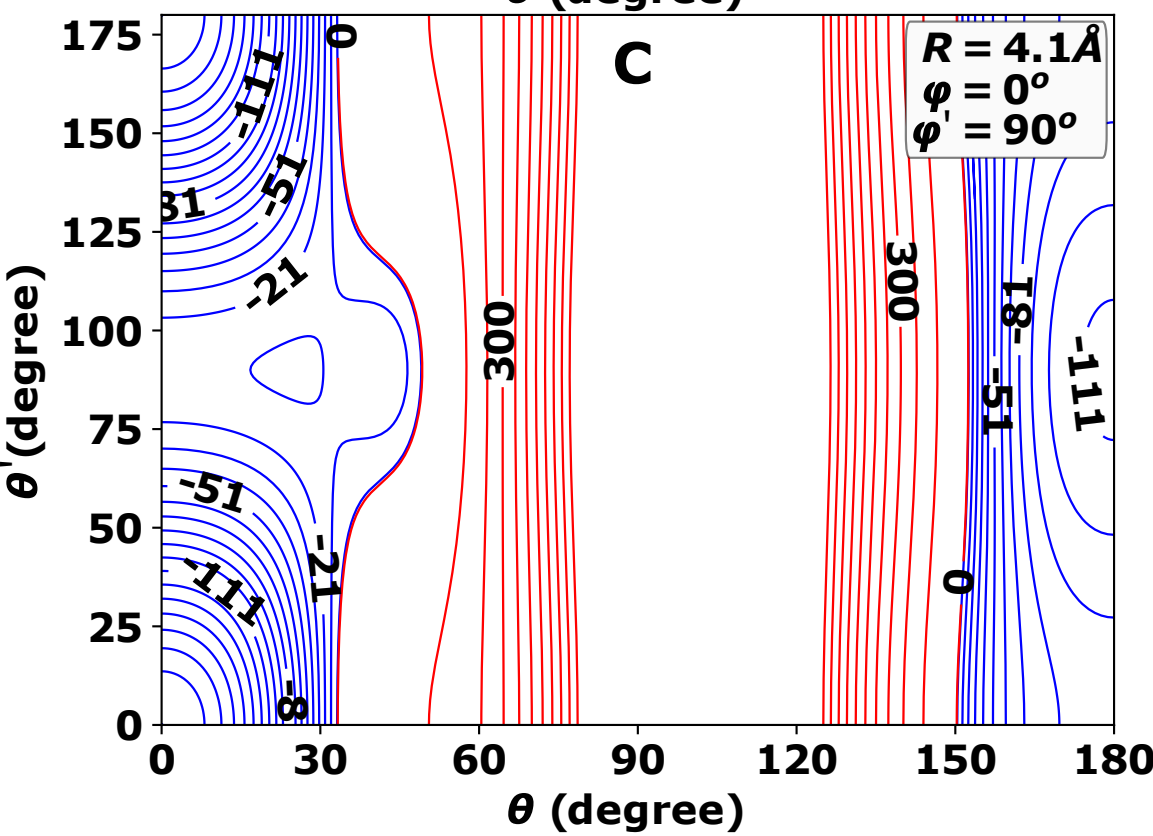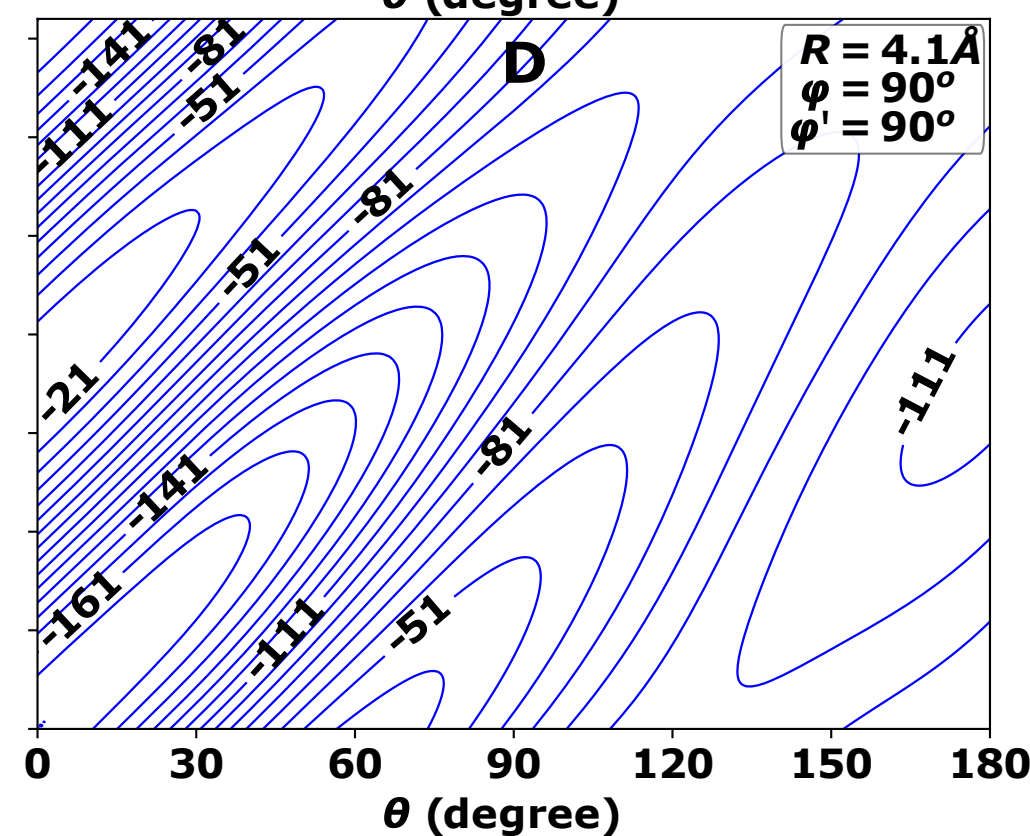

Supplement: d2cp03872b2.pdf [file d2cp03872b2.pdf]

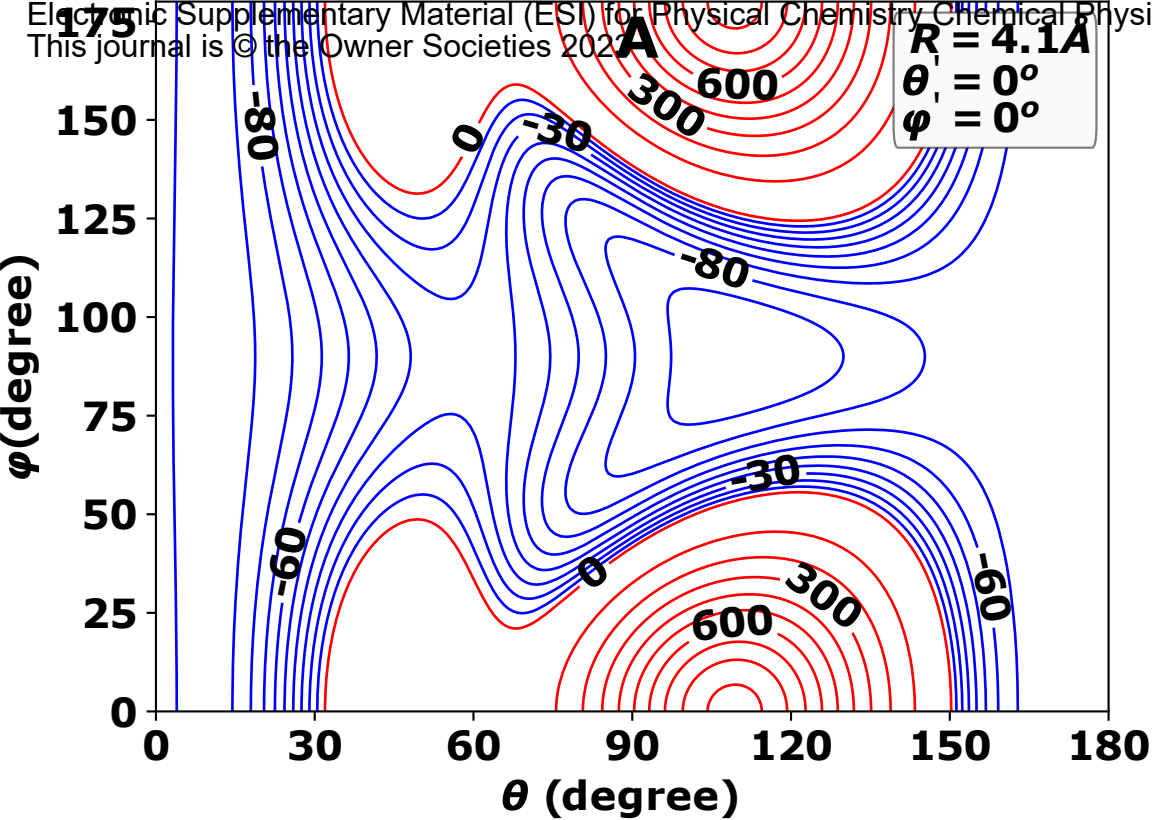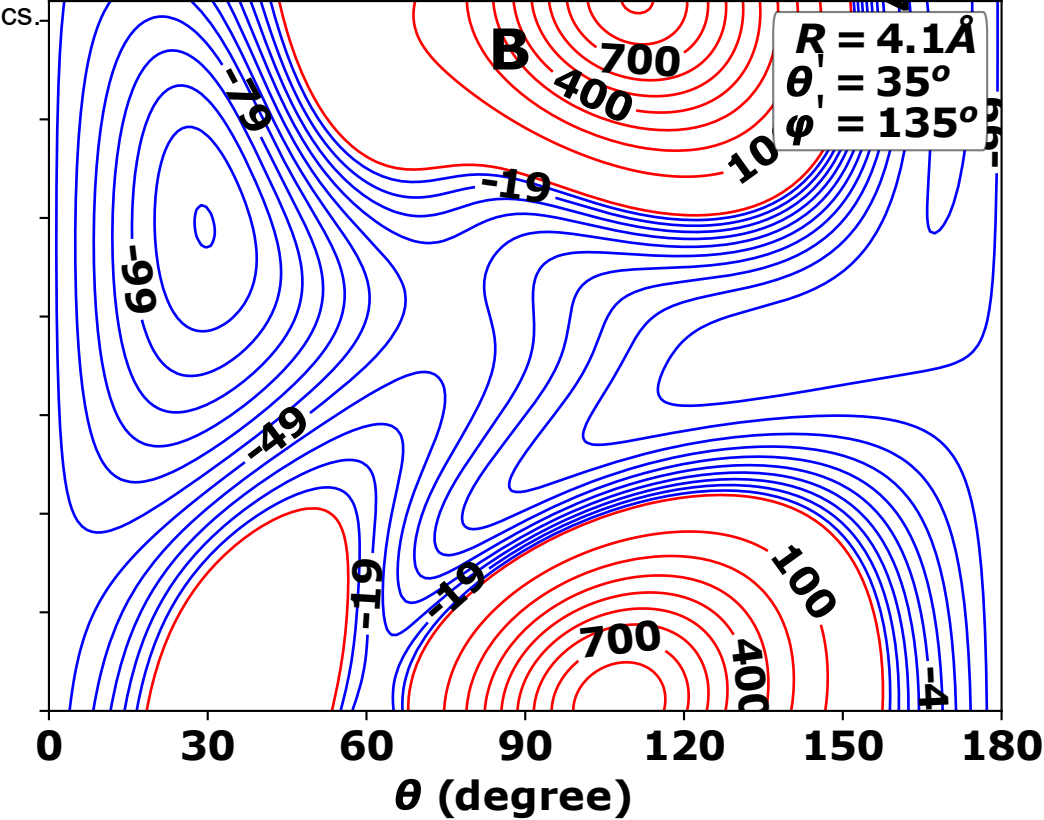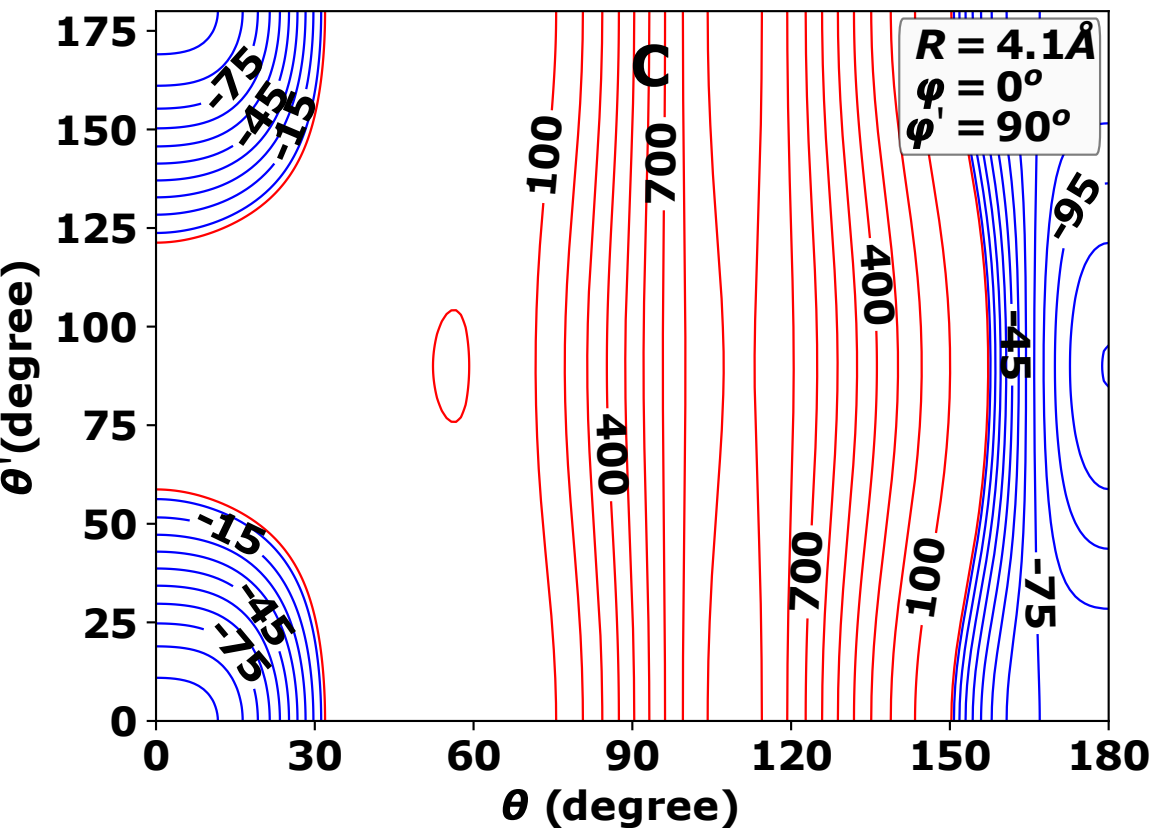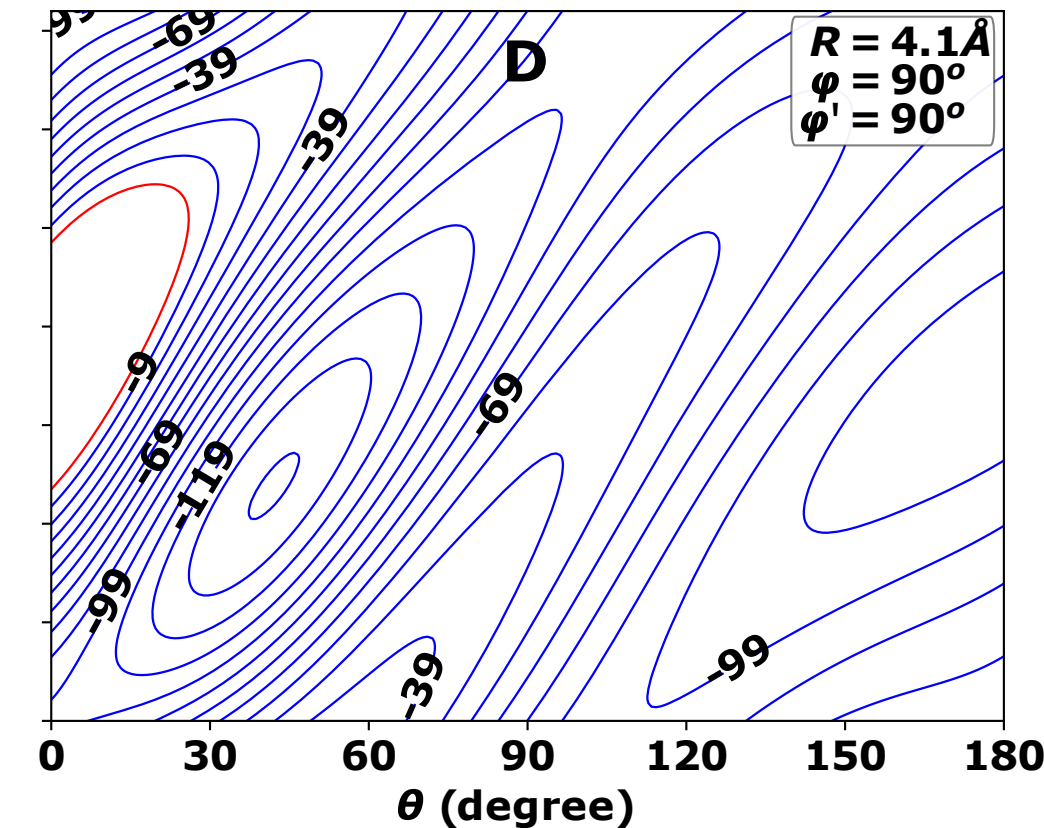

Supplement: d2cp03872b3.pdf [file d2cp03872b3.pdf]

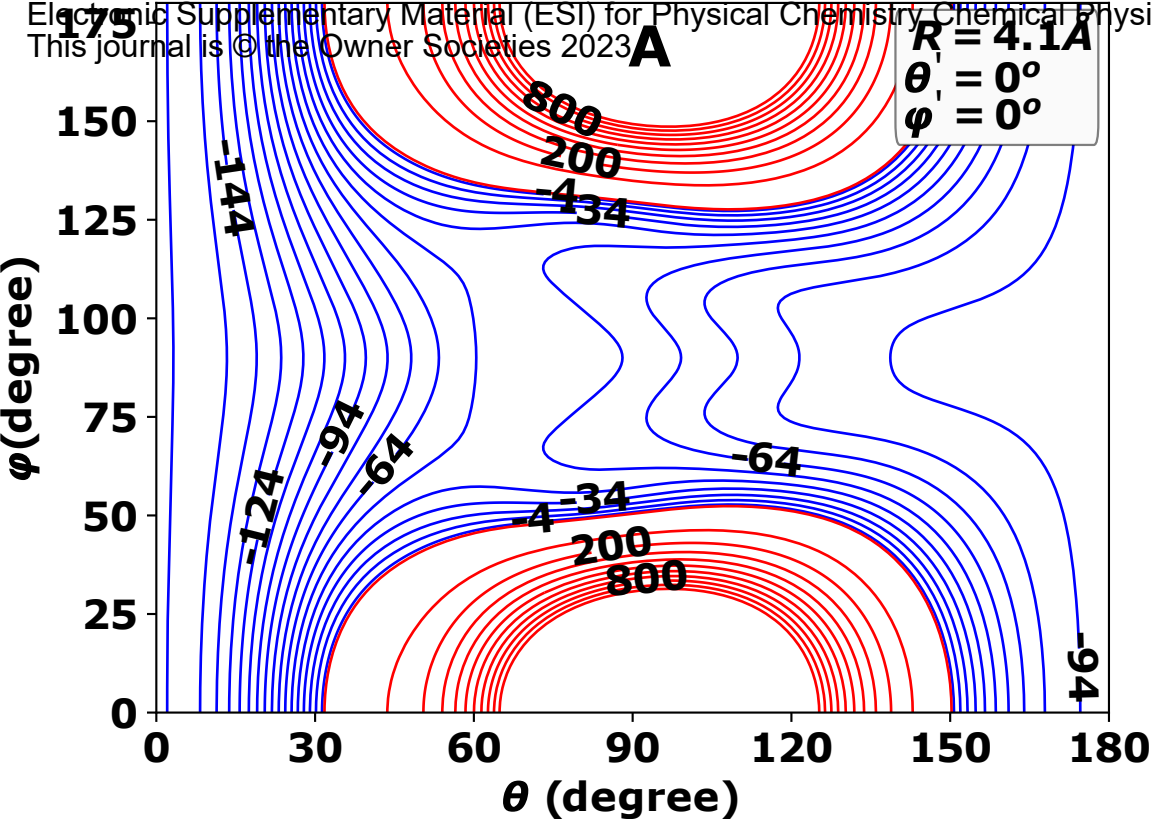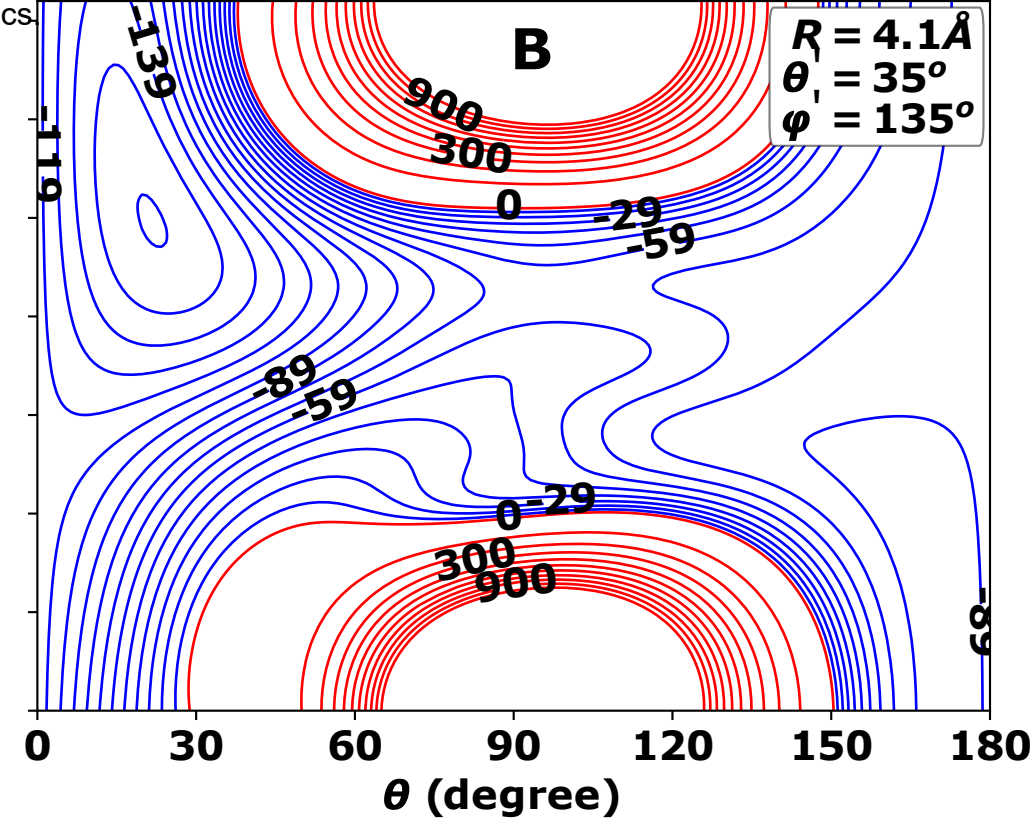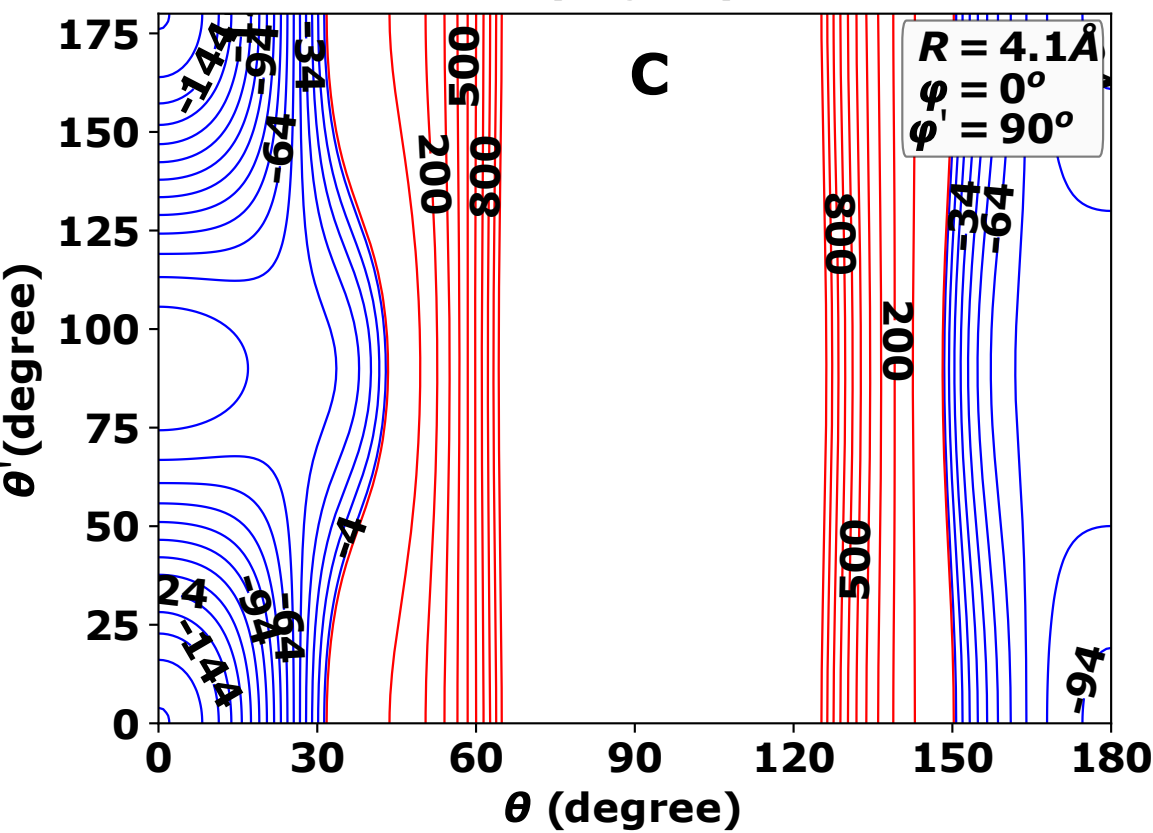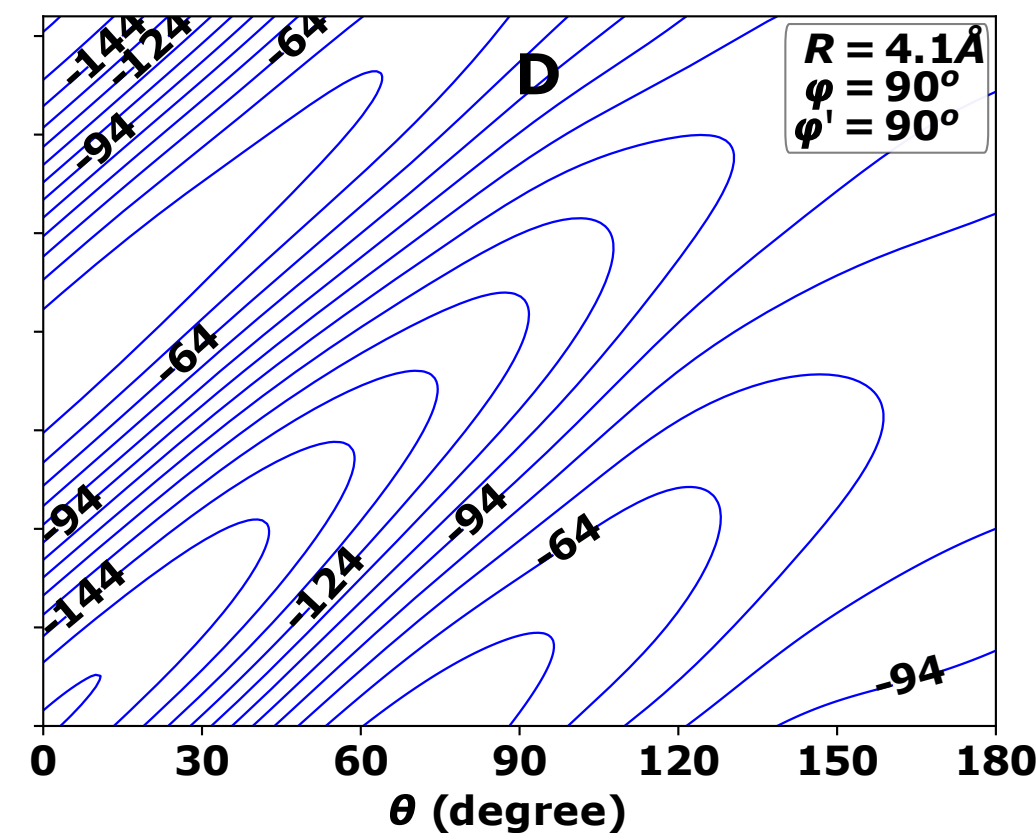

Supplement: d2cp03872b4.pdf [file d2cp03872b4.pdf]

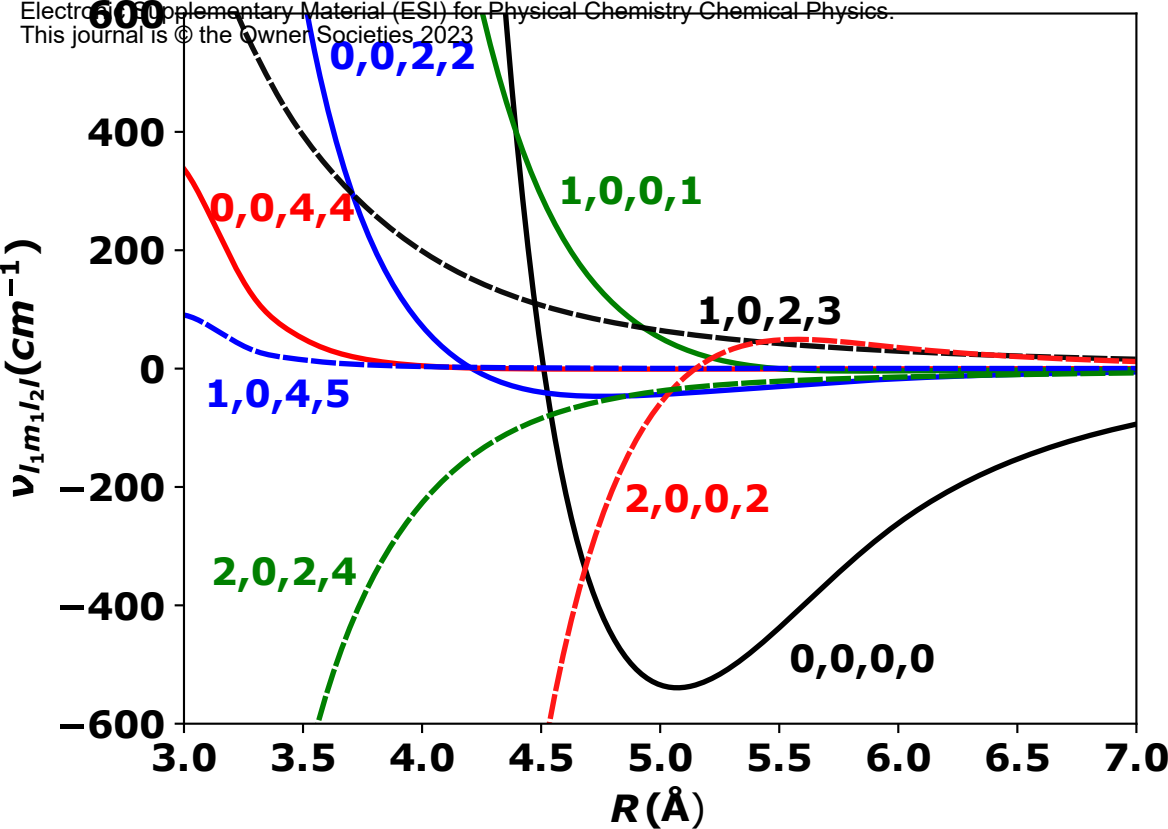

Supplement: d2cp03872b5.pdf [file d2cp03872b5.pdf]

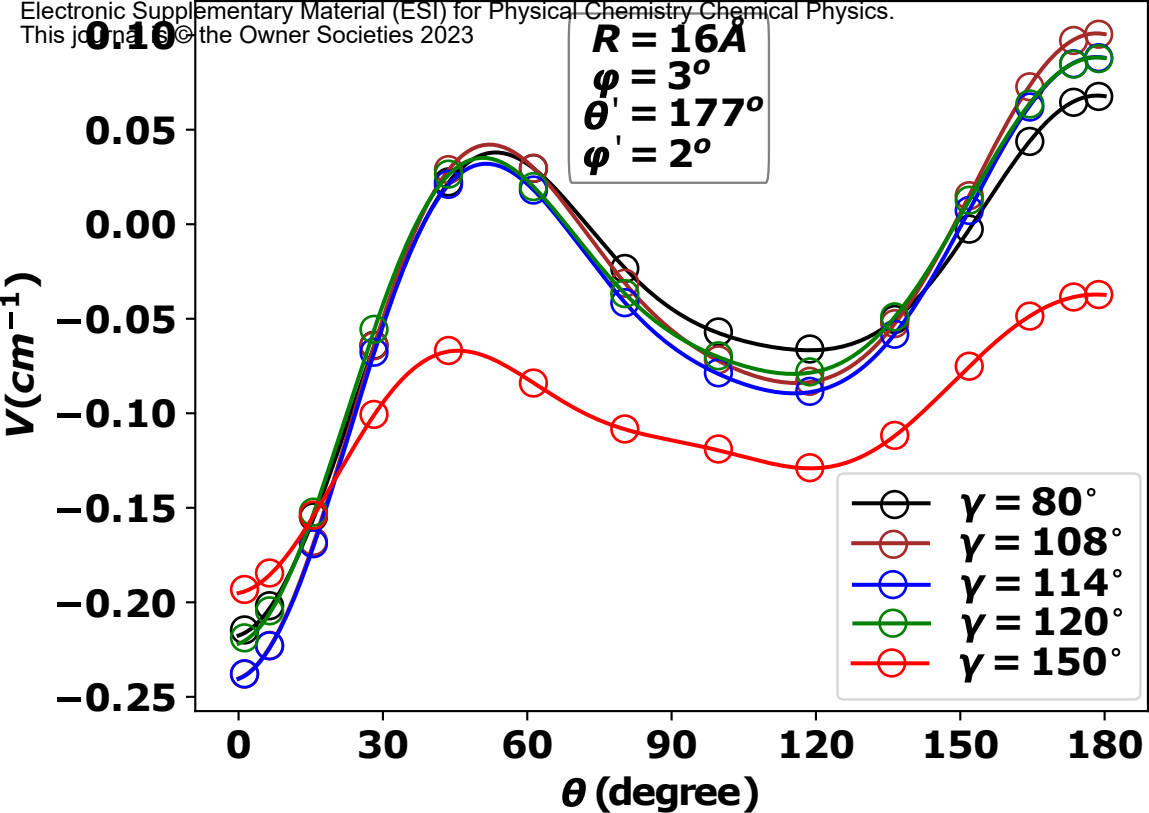

Supplement: d2cp03872b6.pdf [file d2cp03872b6.pdf]

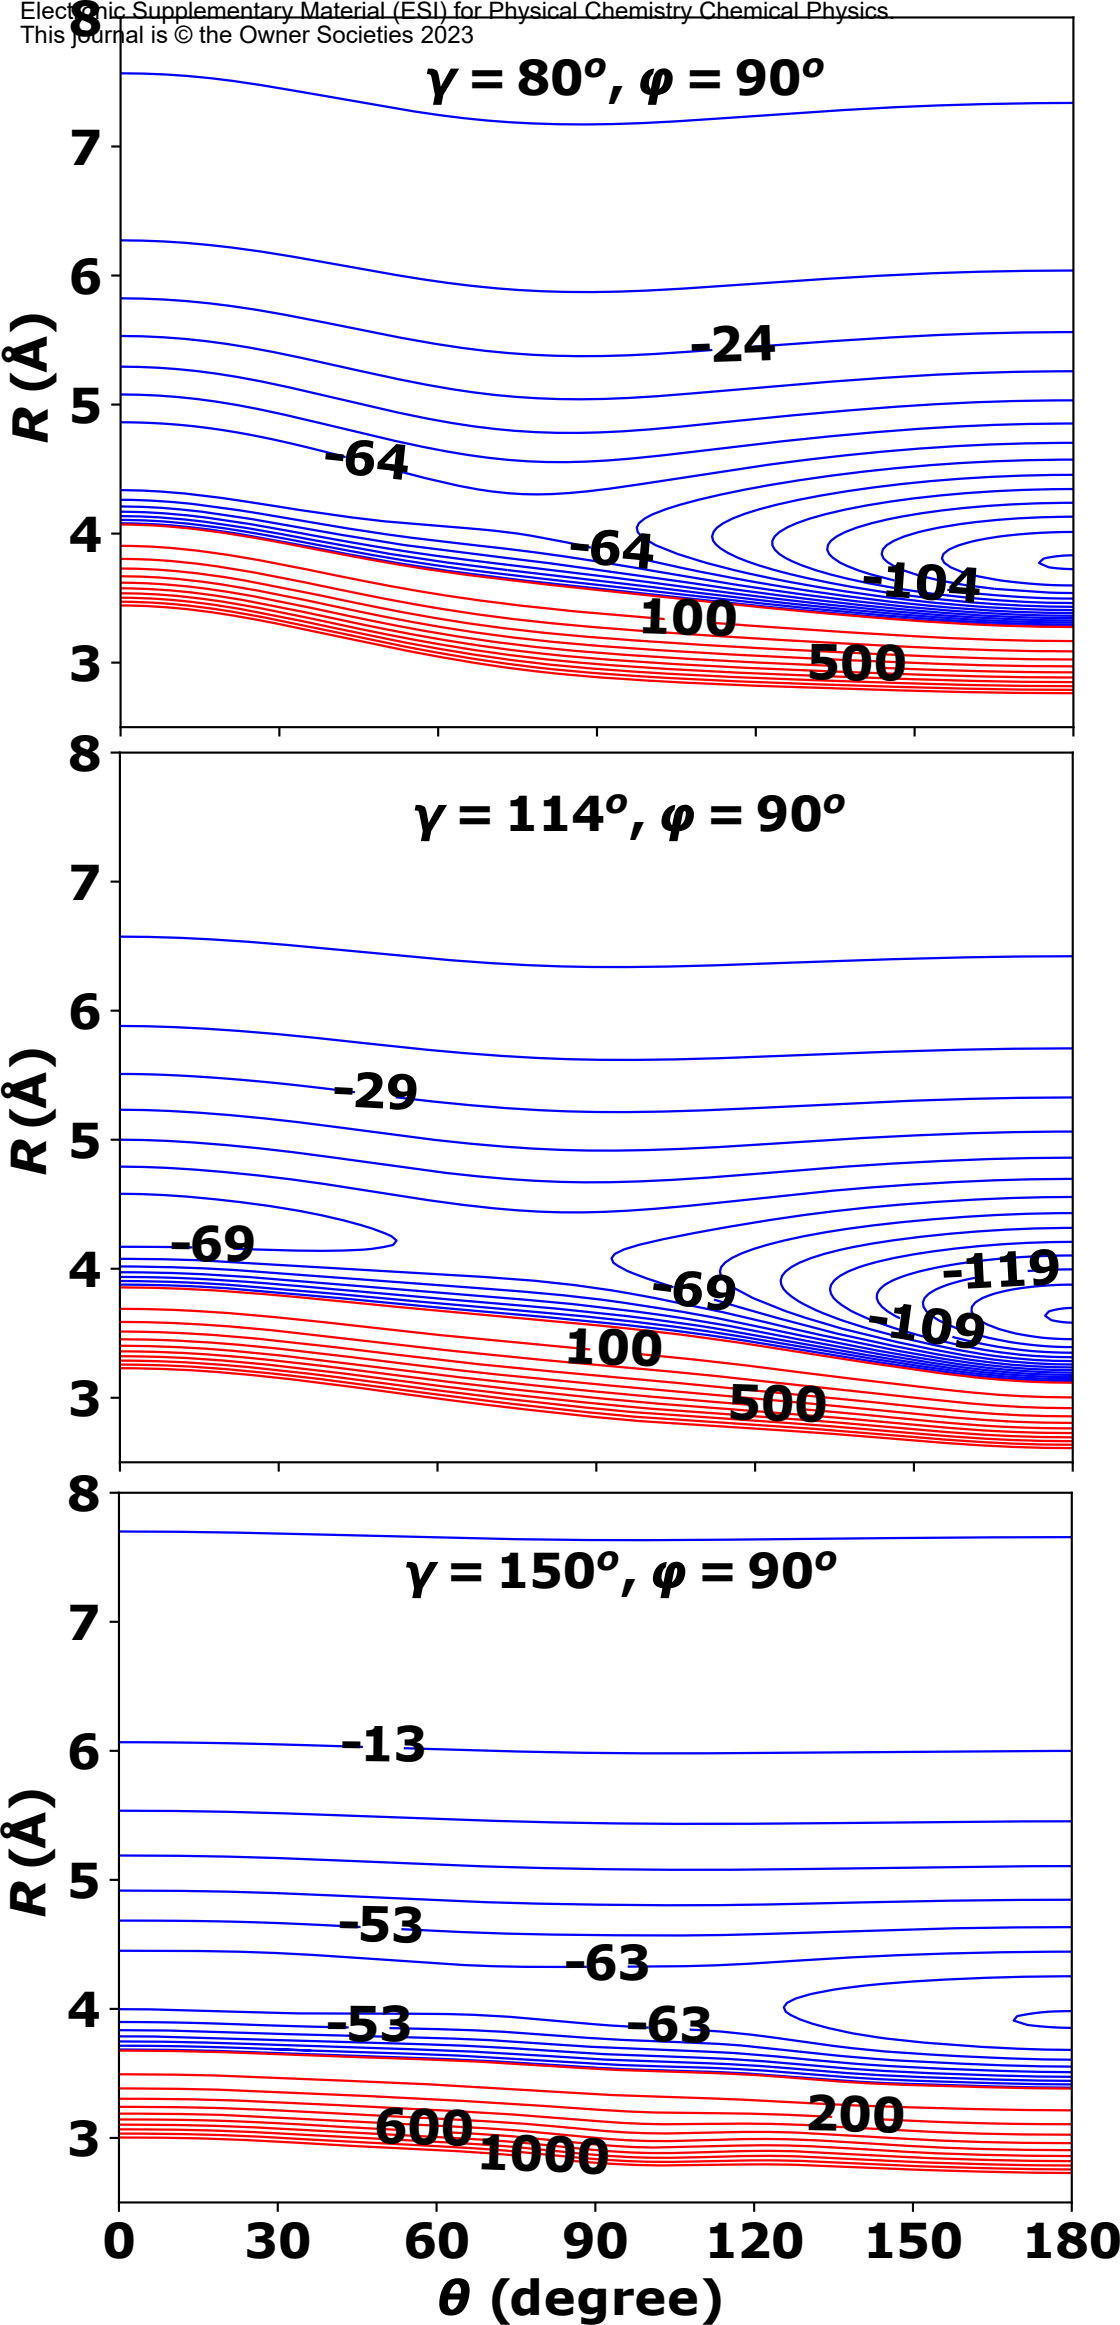

Supplement: d2cp03872b7.pdf [file d2cp03872b7.pdf]
